# Supplementary material for: Lipid-mediated insertion of Toll-like receptor (TLR) ligands for facile immune cell engineering
Source: bioRxiv or medRxiv preprint supplement (doi:10.1101/840876), 2019-11-16

**Fig. S1**

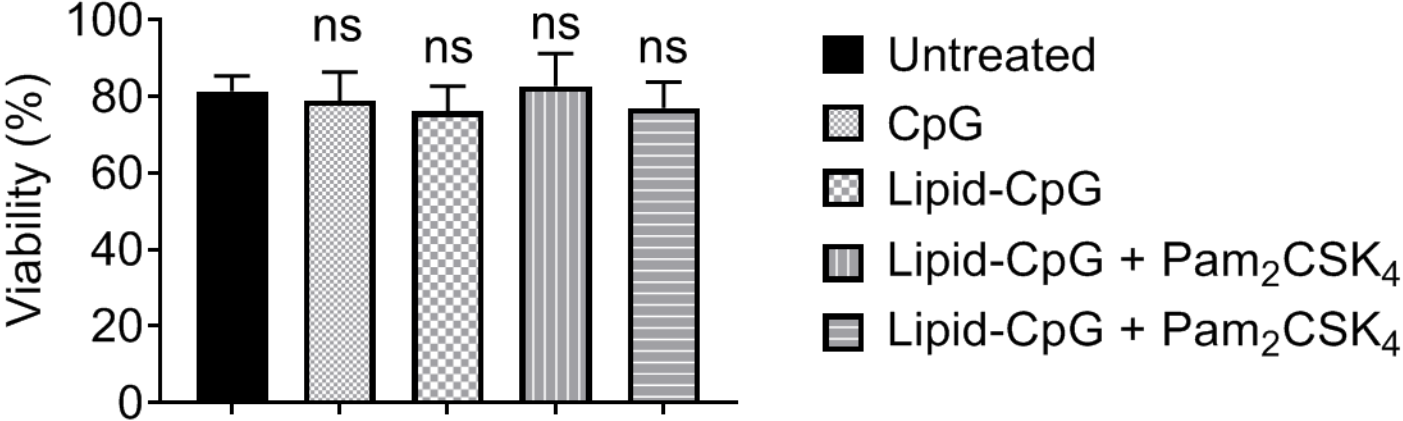

**Fig. S2**

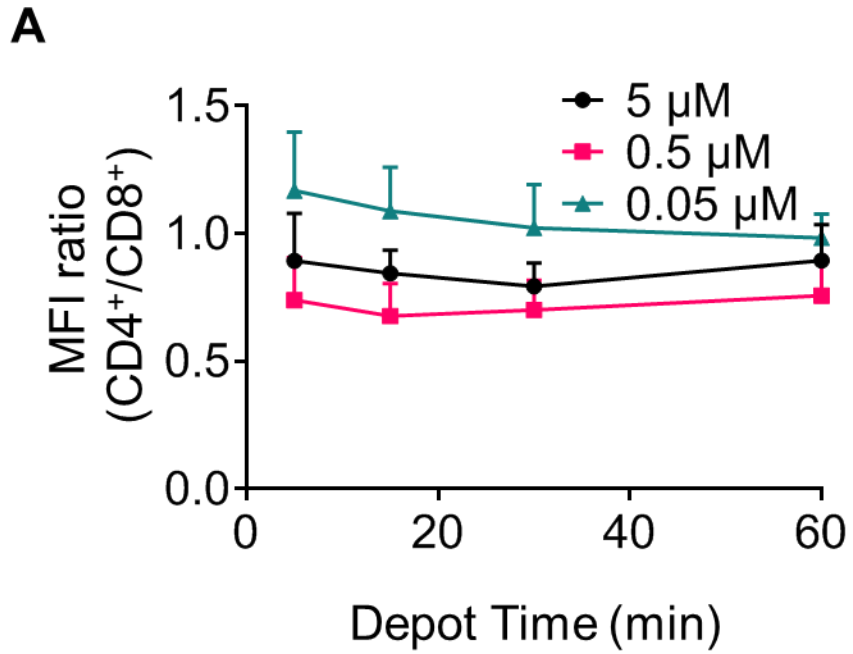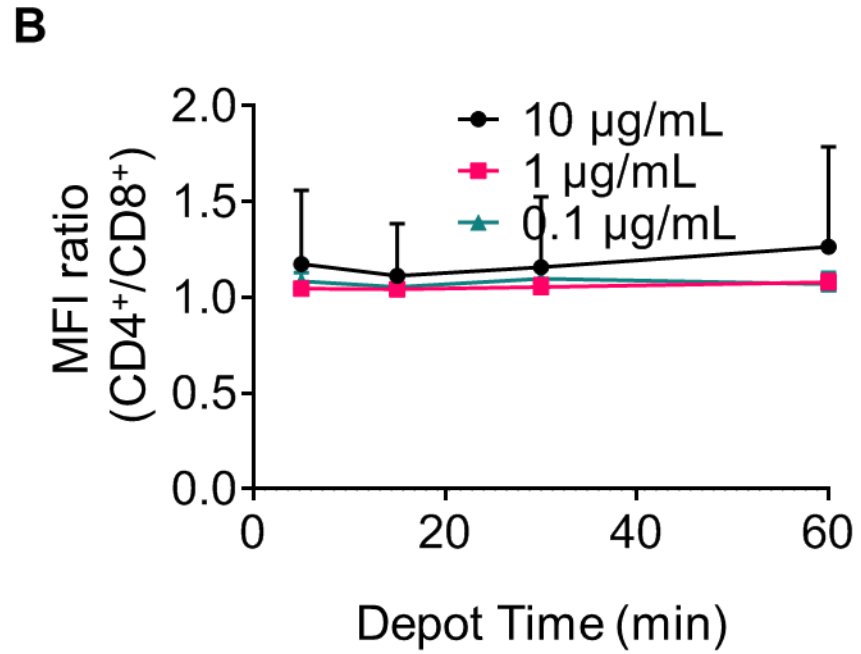

**Table S1**

| TLR2 Ligand                       | # Ligands/T cell | Molecular Weight (g/mol) | ng/T cell | ng/50,000 T cells | ng/mL |
|-----------------------------------|------------------|--------------------------|-----------|-------------------|-------|
| Pam <sub>2</sub> CSK <sub>4</sub> | 1.E+07           | 1724.44                  | 4.E-05    | 2                 | 10    |
| Pam <sub>3</sub> CSK <sub>4</sub> | 2.E+06           | 1962.9                   | 7.E-06    | 0.4               | 2     |

**Fig. S3**

**A**

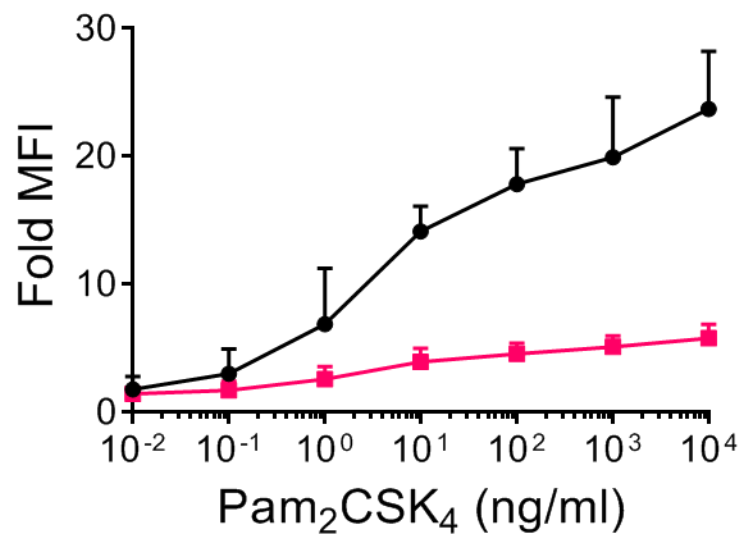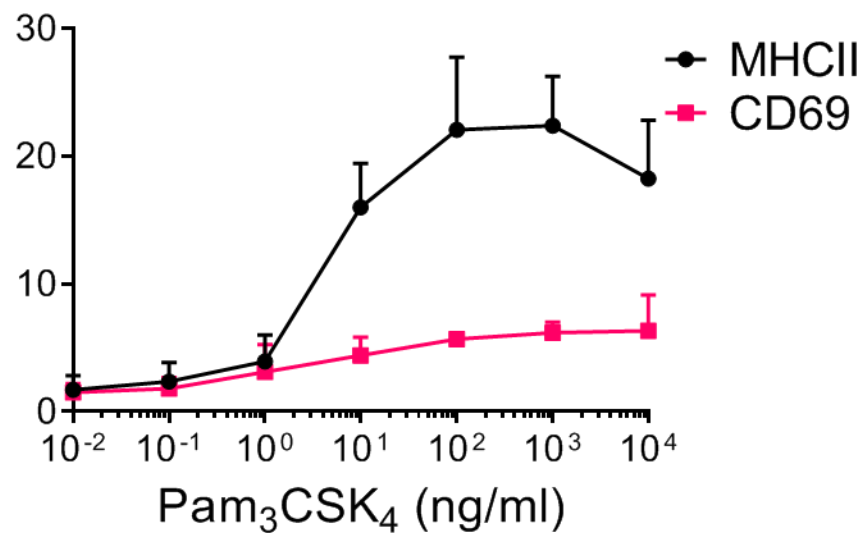

**B**

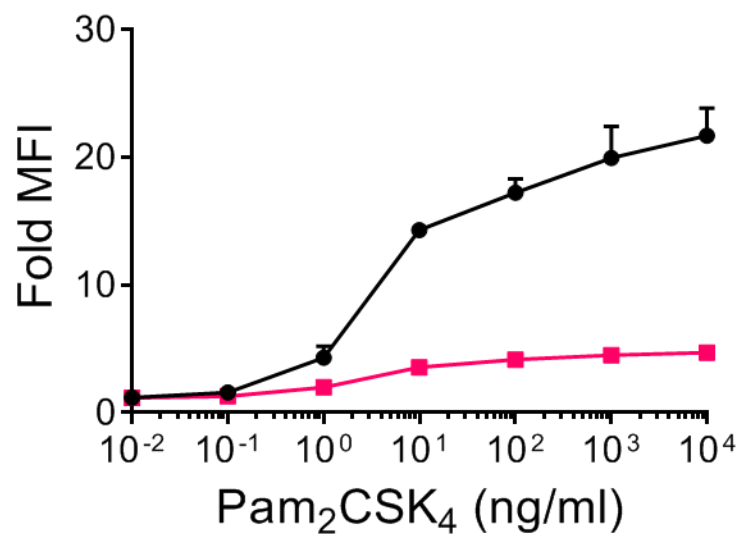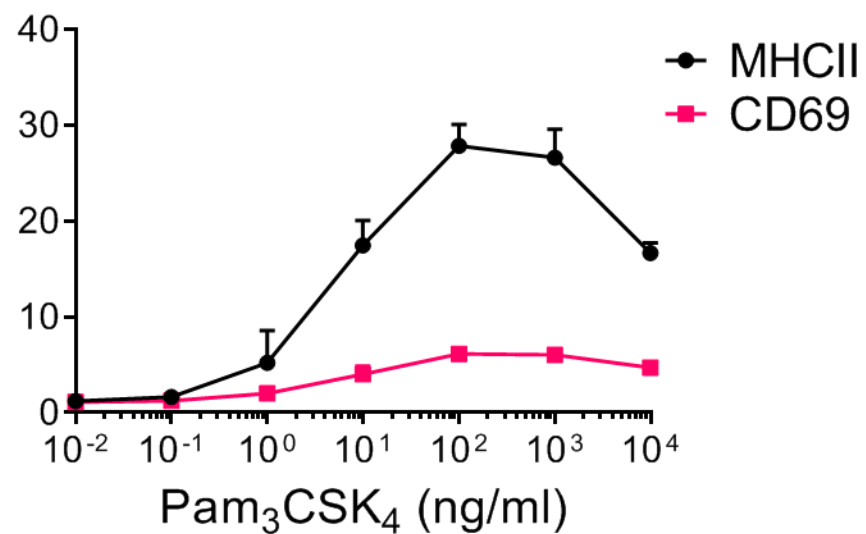

**Fig. S4**

**A)**

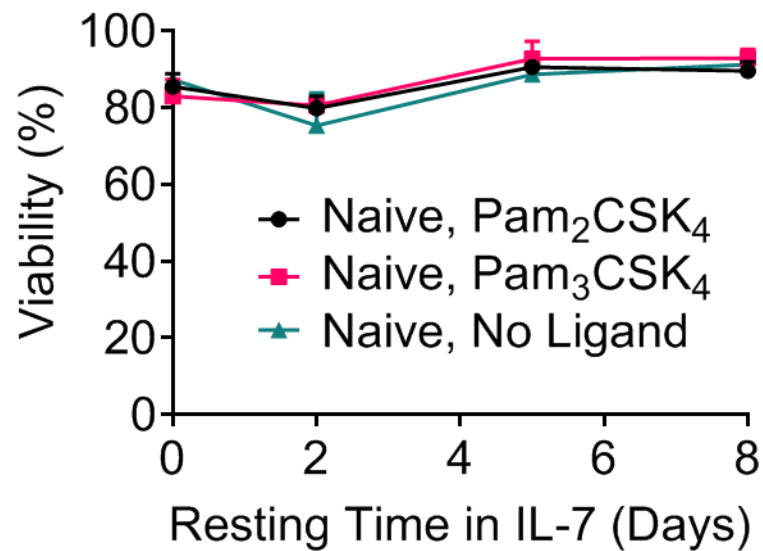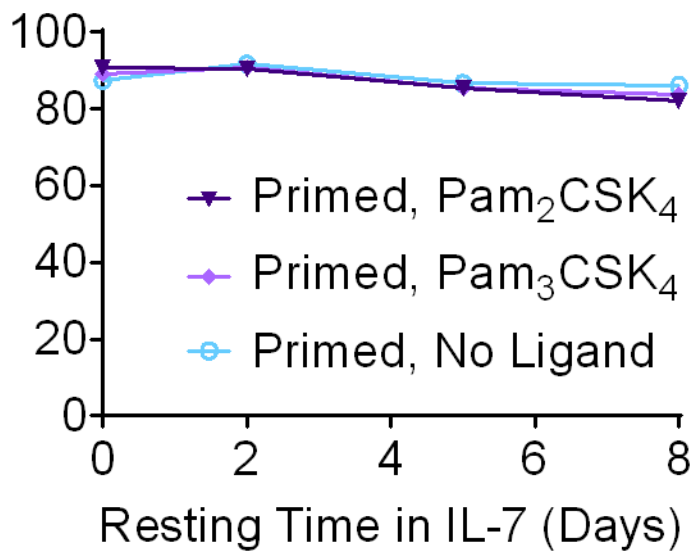

**B)**

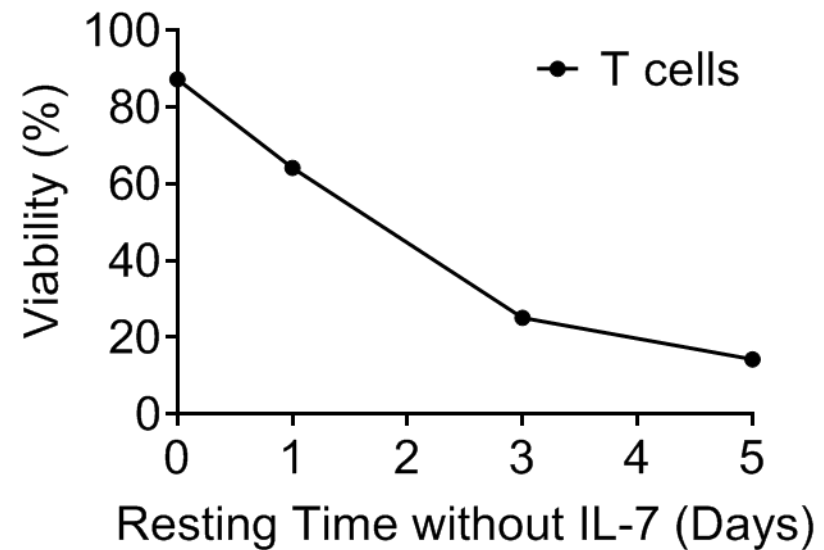

**Fig. S5**

**A**

CD4<sup>+</sup>

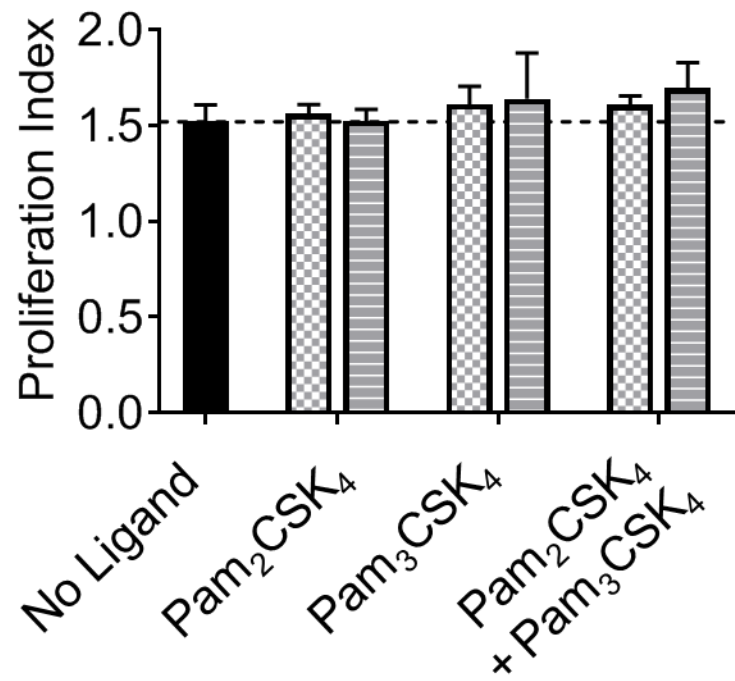

**B**

CD8<sup>+</sup>

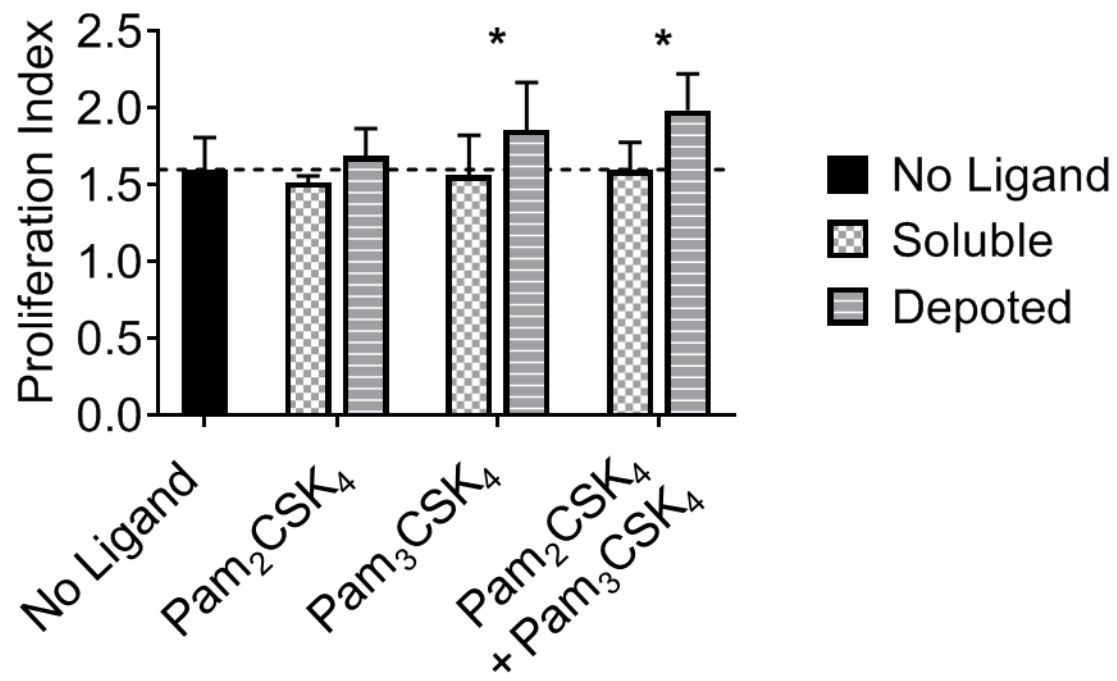

**Fig. S6**

**A**

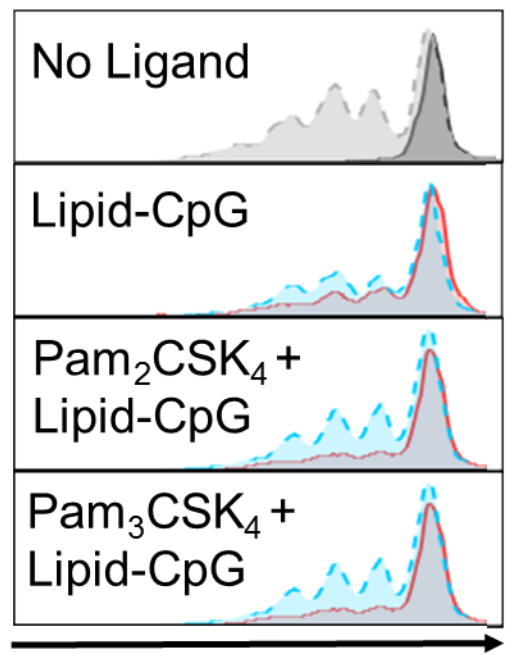

**CFSE**

— No stim

- - - No TLR Ligand

- - - Depoted

— Soluble

■ No Ligand

▣ Soluble

▤ Depoted

**B**

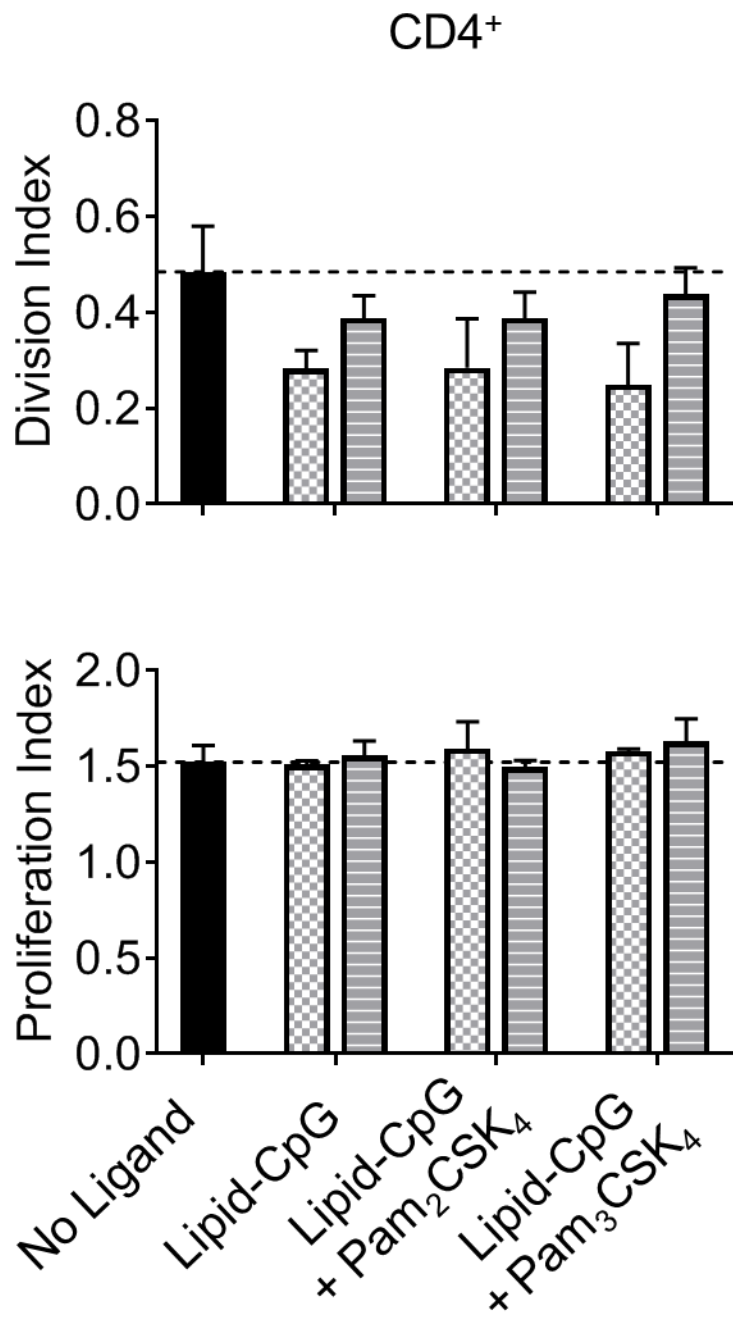

**C**

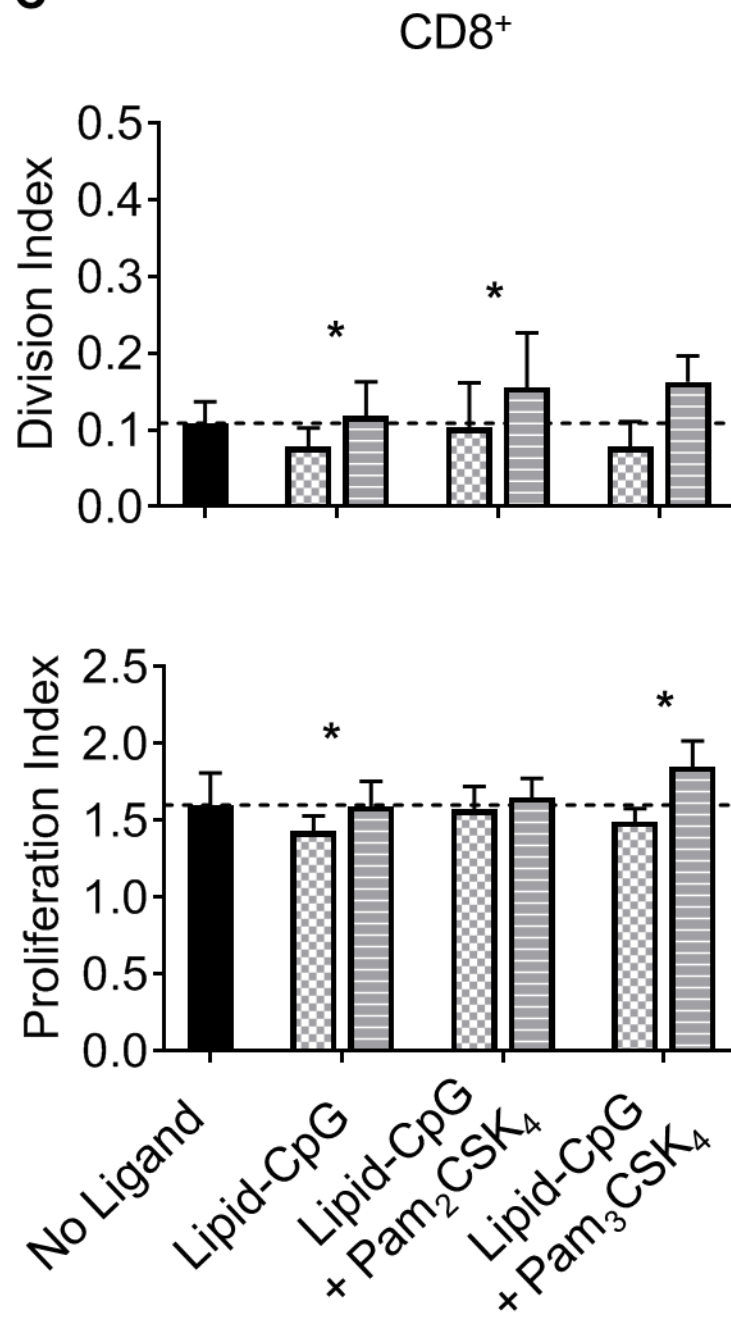

**Fig. S7**

**A**

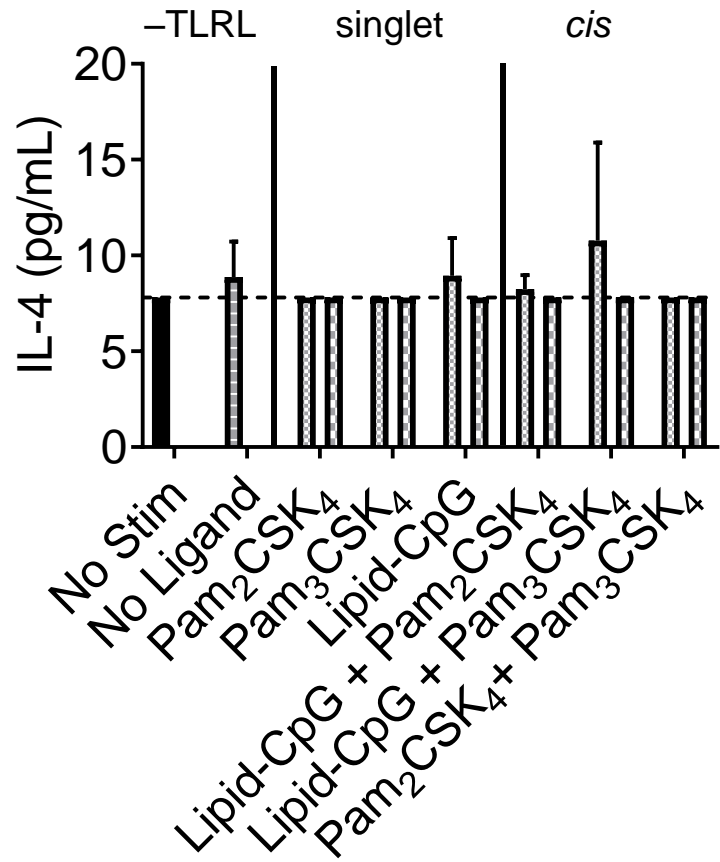

**B**

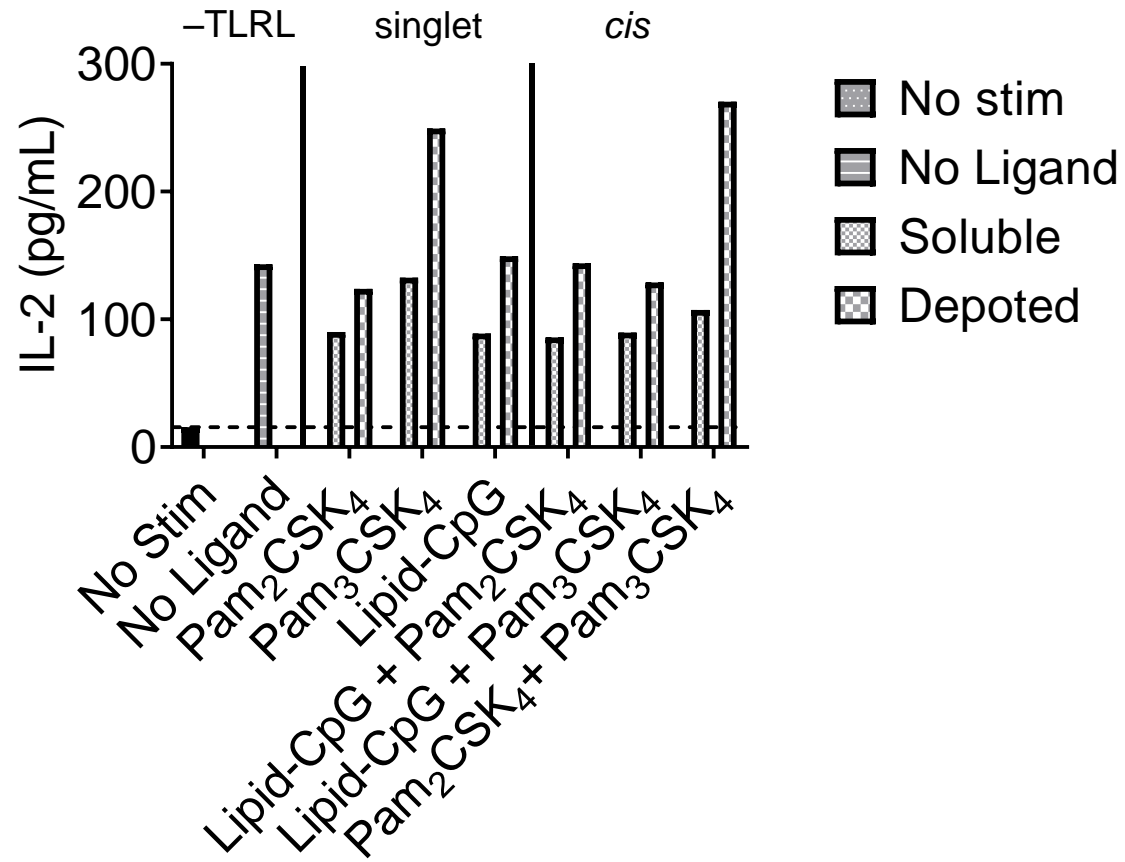



**Fig. S8**

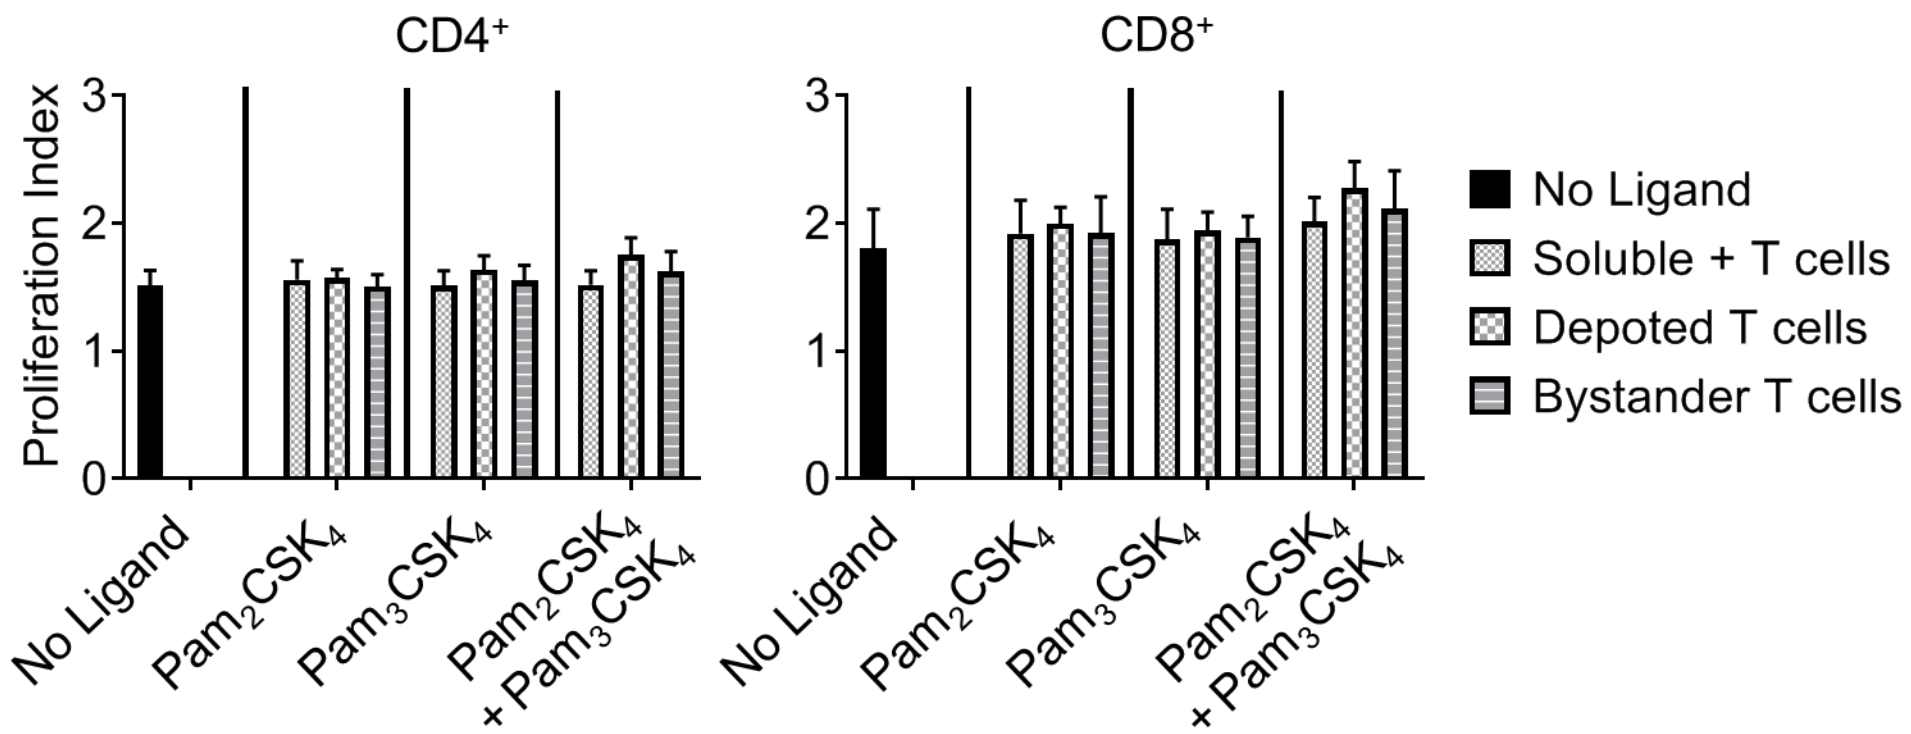

**Fig. S9**

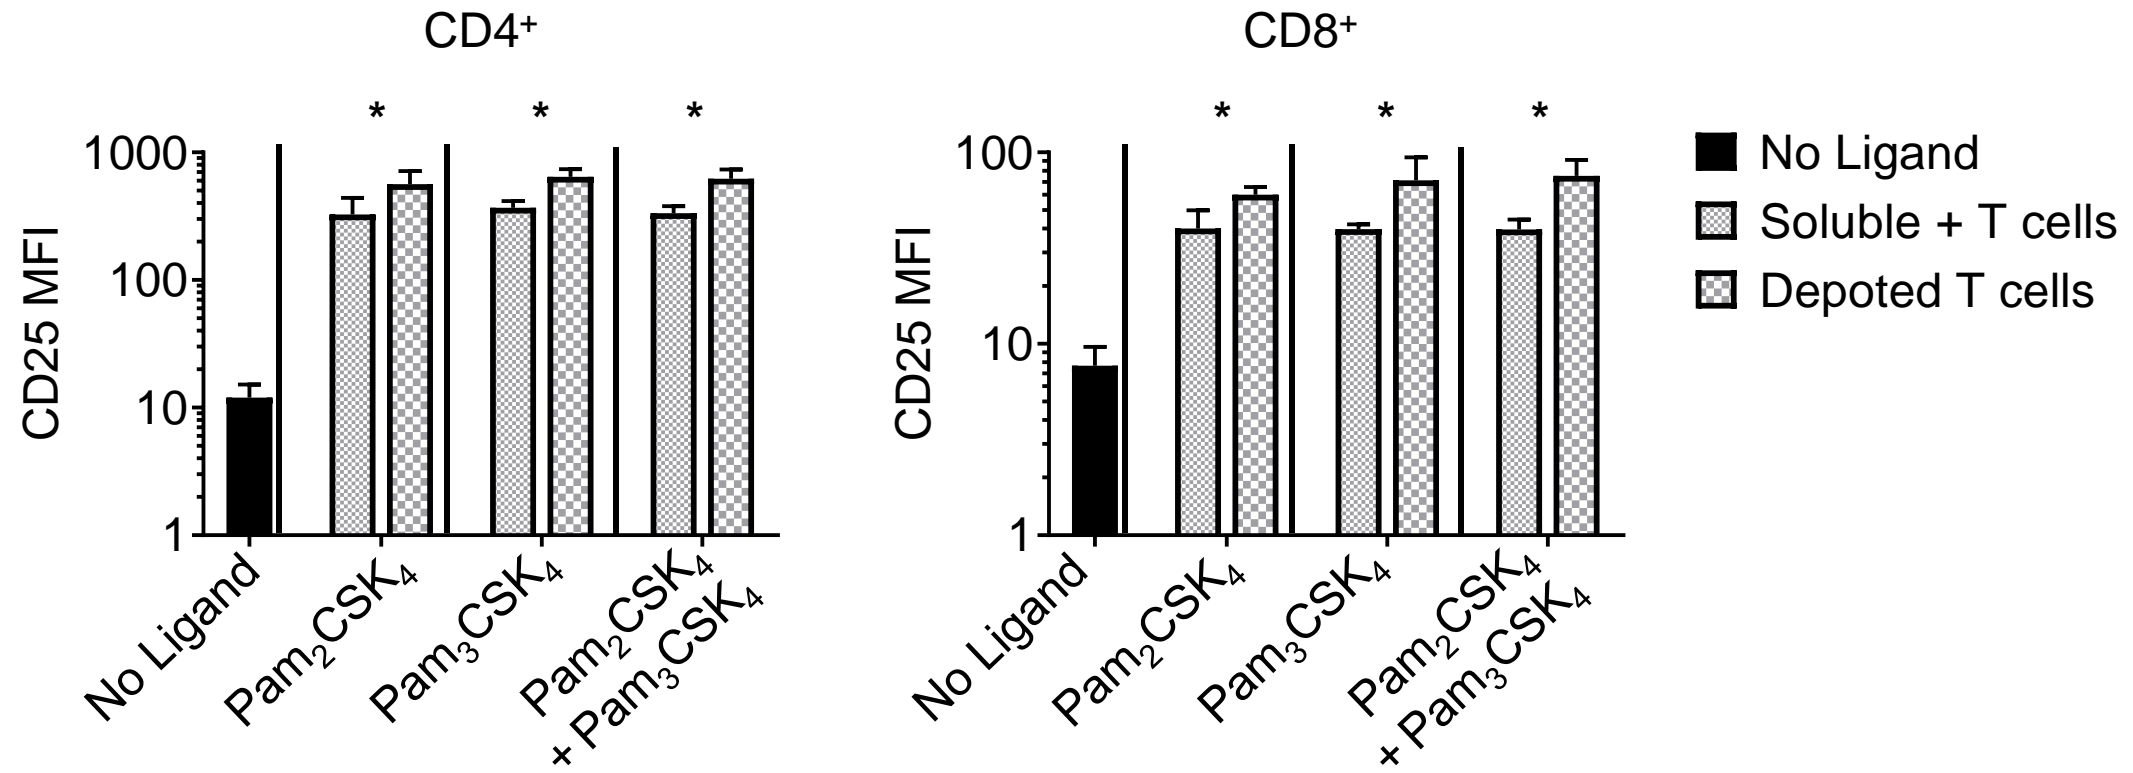

Supplement: Supplementary file [file media-1.pdf]
